# Supplementary material for: Ensemble clustering of longitudinal bivariate HIV biomarker profiles to group patients by patterns of disease progression
Source: Springer Nature journal article supplement (doi:10.1007/s41060-022-00323-2), 2022-05-04

**Cylinder**

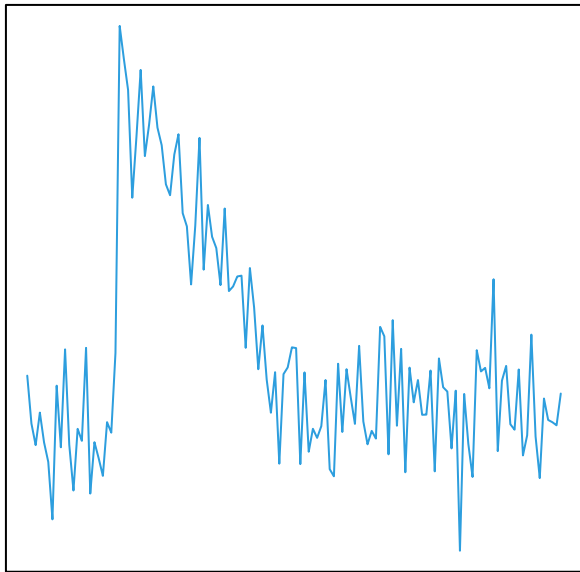

**Bell**

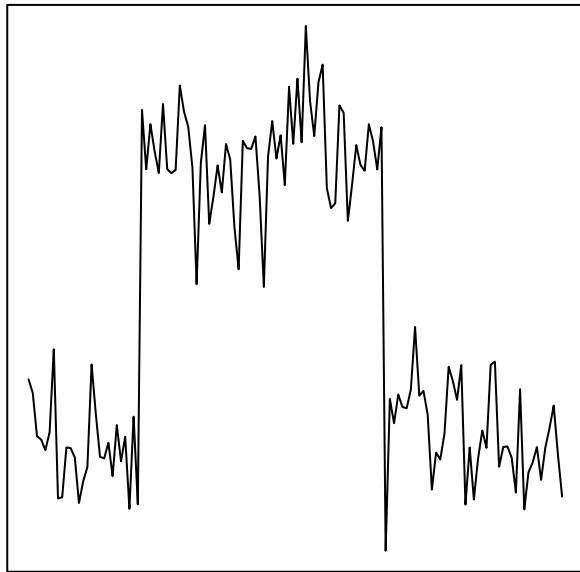

**Funnel**

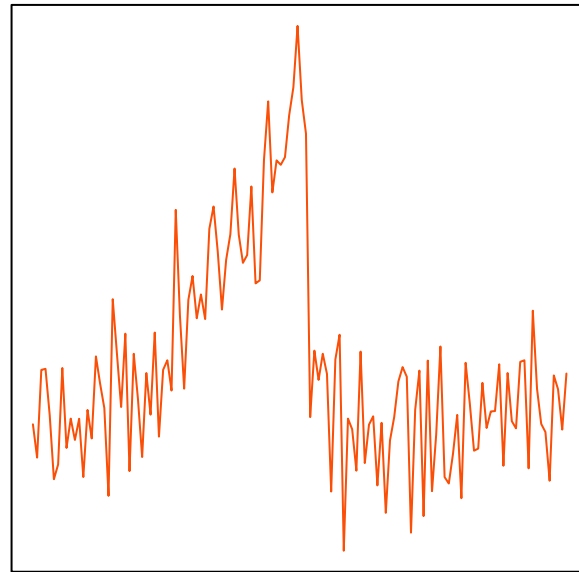

Supplement: 41060_2022_323_MOESM1_ESM.pdf [file 41060_2022_323_MOESM1_ESM.pdf]
