# Supplementary material for: Ensemble clustering of longitudinal bivariate HIV biomarker profiles to group patients by patterns of disease progression
Source: Springer Nature journal article supplement (doi:10.1007/s41060-022-00323-2), 2022-05-04
Supplement: MOESM2 [file 20373442]

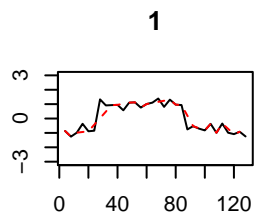

1

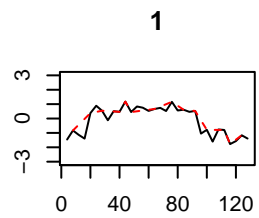

2

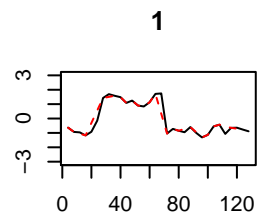

3

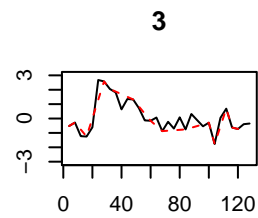

4

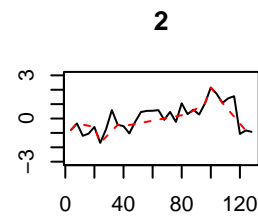

5

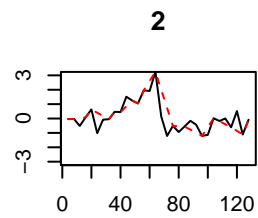

6

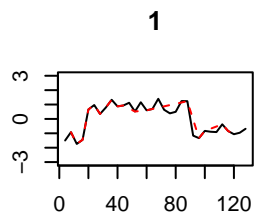

7

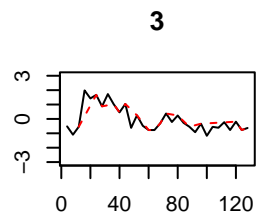

8

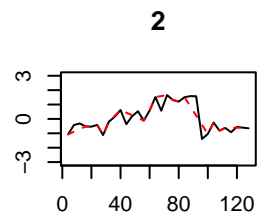

9

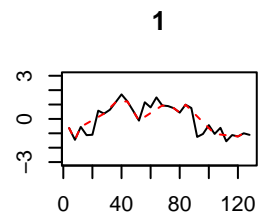

10

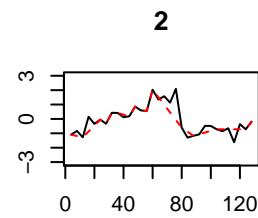

11

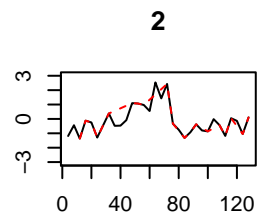

12

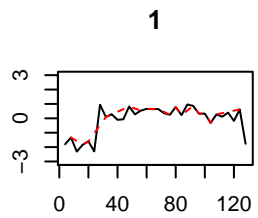

13

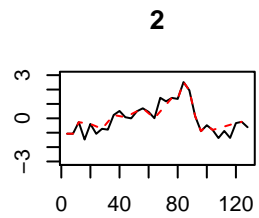

14

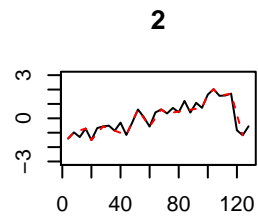

15

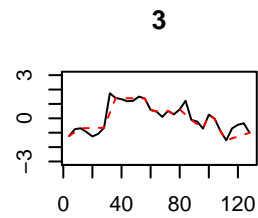

16

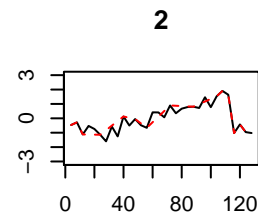

17

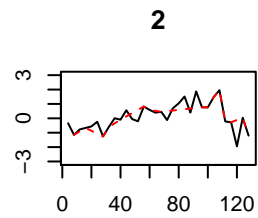

18

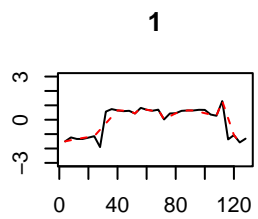

19

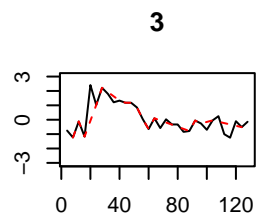

20

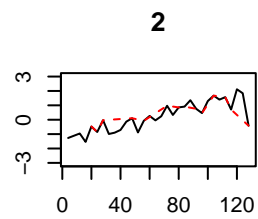

21

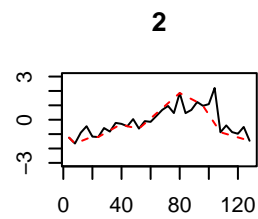

22

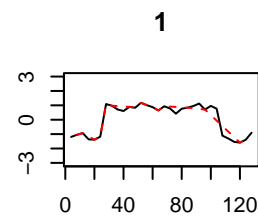

23

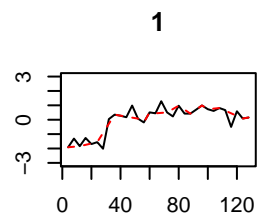

24

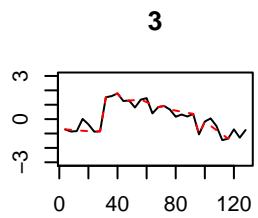

25

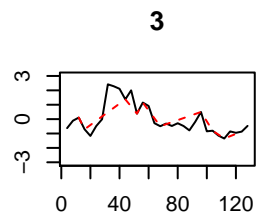

26

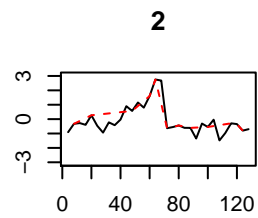

27

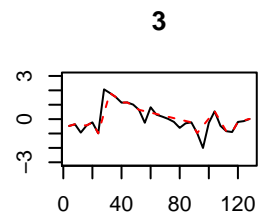

28

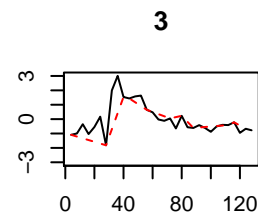

29

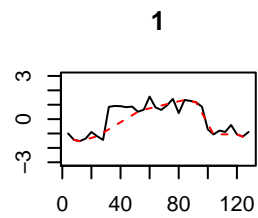

30
